# Supplementary material for: A novel mechanism of RNase L inhibition: Theiler's virus L* protein prevents 2-5A from binding to RNase L
Source: PLOS journal article supplement (doi:10.1371/journal.ppat.1006989), 2018-04-13
Supplement: S4 (10.1371/journal.ppat.1006989.s004) [file journal.ppat.1006989.s004]

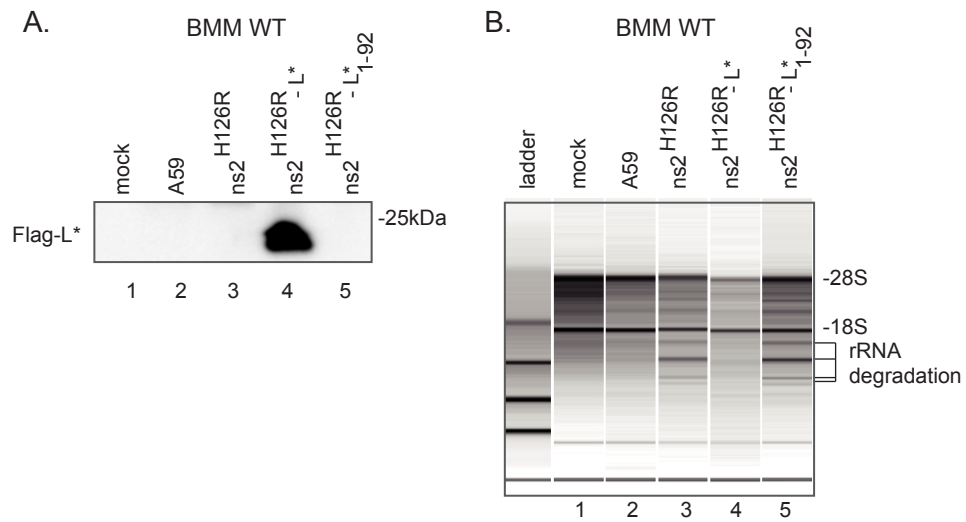

**S4 Fig. Full-length L\* was expressed in ns2H126R-L\*-infected BMMs and inhibited RNase L-mediated RNA degradation.**

A. Flag-L\* expression in infected BMM detected by immunoblotting using an anti-Flag antibody

B. Analysis of RNase L-mediated RNA degradation by RNA chip.
